# Supplementary material
Source: PubMed Central journal article supplement (PMC9753120)
Supplement: mmc1.pdf [file mmc1.pdf]

# THE LANCET

## Supplementary appendix

This appendix formed part of the original submission. We post it as supplied by the authors.

Supplement to: Bhuyan P, Medin J, Gomes da Silva H. Very rare thrombosis with thrombocytopenia after second AZD1222 dose: a global safety database analysis. *Lancet* 2021; published online July 27. [http://dx.doi.org/10.1016/S0140-6736\(21\)01693-7](http://dx.doi.org/10.1016/S0140-6736(21)01693-7).

**Table S1. Characteristics of TTS cases after the second dose of AZD1222**

| Region | Age group, yrs / sex | Symptom onset, days post second dose | Site of thrombosis                                          | Bleeding or coagulopathy                                                          | Platelet nadir, 10 <sup>9</sup> /L | Other medical conditions                                                                                                                                                                                                                                                     | Concomitant medications | Other laboratory findings                                                                                                                          | Treatment                           | Outcome       | Comment                                                                                |
|--------|----------------------|--------------------------------------|-------------------------------------------------------------|-----------------------------------------------------------------------------------|------------------------------------|------------------------------------------------------------------------------------------------------------------------------------------------------------------------------------------------------------------------------------------------------------------------------|-------------------------|----------------------------------------------------------------------------------------------------------------------------------------------------|-------------------------------------|---------------|----------------------------------------------------------------------------------------|
| EU/EEA | 45-60 / M            | 7                                    | Pulmonary embolism<br>Pelvic venous thrombosis              | Pulmonary hemorrhage<br>INR increased<br>Pericardial effusion<br>Pleural effusion | 127                                | Unk                                                                                                                                                                                                                                                                          | Unk                     | Anti-PF4 antibodies: Unk<br>Coags:<br>INR=1.38                                                                                                     | Unk                                 | Recovering    |                                                                                        |
| UK     | 61-85 / M            | 3                                    | Pulmonary embolism<br>Cardiac disorder (right heart strain) | None                                                                              | 119                                | Papillary cystadenoma<br>lymphomatosum<br>Benign prostatic hyperplasia<br>Myocarditis<br>Diverticulum<br>Squamous cell carcinoma of skin (Bowen's disease)<br>Dementia Alzheimer's type<br>Cholelithiasis<br>Pleural fibrosis<br>Psoriasis<br>Vitamin B12 deficiency<br>GERD | Leuprorelin             | Anti-PF4 antibodies: Negative (0.026; cut-off 0.150)<br>Coags:<br>APTT: 37.0 (ratio 1.2)<br>D-dimers: >20,000<br>Blood fibrinogen: 2.6<br>PT: 13.3 | Argatroban infusion; IVIg, apixaban | Recovering    | Prostate-specific antigen was found to be significantly raised; negative COVID-19 test |
| UK     | 45-60 / F            | 10                                   | CVST<br>Pulmonary embolism                                  | None                                                                              | Unk                                | Hypertension                                                                                                                                                                                                                                                                 | Unk                     | Anti-PF4 antibodies: Unk<br>Coags: Unk                                                                                                             | Unk                                 | Not recovered | Limited information                                                                    |
| UK     | 45-60 / F            | 8                                    | Pulmonary embolism                                          | None                                                                              | 113                                | DVT<br>Suspected COVID-19                                                                                                                                                                                                                                                    | Unk                     | Anti-PF4 antibodies: Negative (value not available)<br>Coags:<br>D-dimers: 929                                                                     | Unk                                 | Recovering    | Positive COVID-19 test                                                                 |
| UK     | 61-85 / F            | 9                                    | Pulmonary embolism<br>Embolism<br>Angina pectoris           | None                                                                              | Unk                                | Angina pectoris<br>Hypertension<br>Hypercholesterolemia<br>Diverticulum<br>Asthma<br>Atrioventricular block                                                                                                                                                                  | Unk                     | Anti-PF4 antibodies: Unk<br>Coags: Unk                                                                                                             | Unk                                 | Fatal         | Pulmonary embolism was a post-mortem findings                                          |

|    |              |    |                                |                                                       |     |                                                                                                                                                                                       |                                                                                                                                     |                                                                                                                                     |                                                                                      |                            |                                                                                                                                                                                                                                                                                                             |
|----|--------------|----|--------------------------------|-------------------------------------------------------|-----|---------------------------------------------------------------------------------------------------------------------------------------------------------------------------------------|-------------------------------------------------------------------------------------------------------------------------------------|-------------------------------------------------------------------------------------------------------------------------------------|--------------------------------------------------------------------------------------|----------------------------|-------------------------------------------------------------------------------------------------------------------------------------------------------------------------------------------------------------------------------------------------------------------------------------------------------------|
|    |              |    |                                |                                                       |     | Type 2 diabetes mellitus<br>Pacemaker<br>Cervical spondylosis                                                                                                                         |                                                                                                                                     |                                                                                                                                     |                                                                                      |                            |                                                                                                                                                                                                                                                                                                             |
| UK | 61-85 /<br>F | 13 | Pulmonary embolism             | Hemorrhage intracranial<br>Subarachnoid<br>hemorrhage | 103 | Hysterectomy<br>Hypertension<br>Non-alcoholic fatty liver<br>disease                                                                                                                  | Unk                                                                                                                                 | Anti-PF4 antibodies: Unk<br>Coags:<br>APTT: 65.4<br>Fibrinogen: 0.6<br>PT:17                                                        | Unk                                                                                  | Fatal                      |                                                                                                                                                                                                                                                                                                             |
| UK | Unk / M      | 1  | CVST                           | Purpura non-<br>thrombocytopenic                      | 58  | Myocardial ischemia<br>Prostate cancer<br>Cardiac failure<br>Neurodermatitis                                                                                                          | Unk                                                                                                                                 | Coags: Unk                                                                                                                          | As hemoglobin<br>was also low,<br>he was<br>transfused                               | Not recovered              | Conflicting information<br>regarding both purpura and<br>radiographic findings<br>excluding cavernous<br>venous thrombosis                                                                                                                                                                                  |
| UK | 61-85 /<br>M | 11 | DVT                            | Cerebral hemorrhage                                   | 93  | Prostate cancer with recent<br>diagnosis of bone<br>metastasis<br>COPD<br>Myocardial ischemia<br>Cardiac assistance device<br>user<br>Cerebrovascular accident<br>Atrial fibrillation | Bicalutamide                                                                                                                        | Anti-PF4 antibodies: Negative<br>(ELISA; value not available)<br>Coags:<br>APTT: 38<br>Fibrinogen: 1.1<br>D-dimers: 20000<br>PT: 31 | Anticoagulation<br>/ antiplatelet<br>medication at<br>admission; one<br>dose of IVIg | Fatal                      | The vaccinee had arm<br>swelling and the patient<br>was due to have an<br>ultrasound doppler of his<br>arm to determine if it was a<br>DVT or cellulitis. He also<br>had confusion and CT head<br>with contrast showed the<br>multiple spontaneous<br>bleeds. The cause of death<br>was cerebral hemorrhage |
| UK | 61-85 /<br>M | 5  | Embolism<br>Pulmonary embolism | Hemorrhage                                            | 117 | Emphysema<br>Head injury<br>Fall<br>Thrombocytopenia<br>Aortic aneurysm<br>Vena cava filter insertion                                                                                 | Anti-d<br>immunoglobulin                                                                                                            | Anti-PF4 antibodies: Unk<br>Coags:<br>APTT: 30.5<br>Fibrinogen: 0.9<br>D-dimers: 83.82 µg/ml FEU<br>PT:13.6                         | Unk                                                                                  | Recovered<br>with sequelae | Platelet count in November<br>2020 was 145 and<br>concomitant Anti-d<br>immunoglobulin. Past drug<br>heparin                                                                                                                                                                                                |
| UK | 61-85 /<br>F | 3  | Thrombotic stroke              | None                                                  | Unk | Unk                                                                                                                                                                                   | Ramipril                                                                                                                            | Anti-PF4 antibodies: Unk<br>Coags: Unk                                                                                              | Unk                                                                                  | Not recovered              | Limited information                                                                                                                                                                                                                                                                                         |
| UK | 61-85 /<br>F | 3  | Embolism                       | Contusion<br>Epistaxis                                | 5   | Diabetes mellitus<br>Pulmonary embolism<br>DVT                                                                                                                                        | Amlodipine for<br>hypertension,<br>atorvastatin for<br>high cholesterol<br>and latanoprost<br>for glaucoma.<br>Past drug<br>therapy | Anti-PF4 antibodies: Unk<br>Coags:<br>APTT: 1.09<br>Fibrinogen: 4.16<br>PT: 1.0                                                     |                                                                                      | Not recovered              | Platelet count in March<br>2021 was 209                                                                                                                                                                                                                                                                     |

|    |           |     |                                      |      |      |                                                                                                                                                                     |                                                                                                                       |                                                                                               |                                                      |               |                                                                                                                                                                                                       |
|----|-----------|-----|--------------------------------------|------|------|---------------------------------------------------------------------------------------------------------------------------------------------------------------------|-----------------------------------------------------------------------------------------------------------------------|-----------------------------------------------------------------------------------------------|------------------------------------------------------|---------------|-------------------------------------------------------------------------------------------------------------------------------------------------------------------------------------------------------|
|    |           |     |                                      |      |      |                                                                                                                                                                     | included heparin                                                                                                      |                                                                                               |                                                      |               |                                                                                                                                                                                                       |
| UK | 61-85 / F | <10 | Cerebrovascular accident<br>Embolism | None | <150 | Atrial fibrillation                                                                                                                                                 | Apixaban, bisoprolol, digoxin for atrial fibrillation, furosemide for oedema, memantine for memory loss               | Anti-PF4 antibodies: Unk<br>Coags: Unk                                                        | Unk                                                  | Not recovered | Limited information. Past drugs included heparin                                                                                                                                                      |
| UK | 45-60 / F | 5   | CVST<br>Pulmonary embolism           | None | 27   | Bilateral lung metastases, brain mets hilar and mediastinal lymph nodes, grade 3<br>Radiotherapy<br>Breast cancer (grade 3; ER6; PR4; HER2 negative)<br>Head injury | Capecitabine, letrozole for breast cancer (since April 16, 2021), enoxaparin for prophylaxis (from April 16-29, 2021) | Anti-PF4 antibodies: Unk<br>Coags:<br>APTT: 23<br>Fibrinogen: 4.6<br>D-dimers: 4898<br>PT: 12 | Non-heparin anticoagulation; antiplatelet medication | Not recovered | Patient was started on capecitabine, letrozole for breast cancer, and enoxaparin for prophylaxis 8 days before dose 2; last radiotherapy treatment 18 days before dose 2. Past drugs included heparin |

Due to the incompleteness of post-market reporting, some information is unknown. This is denoted in the table. Other unknown information at the time of data cutoff includes the time from the second dose to the start of platelet count drop, and to platelet nadir. To protect patient privacy, patient region is reported as either EU/EEA or UK, and ages are reported in two categories: 45-60 yrs or 61-85 yrs.

APTT, activated partial thromboplastin time; Coags, coagulation profile; COPD, chronic obstructive pulmonary disease; COVID-19, coronavirus 2019; CT, computerized tomography; CVST, cerebral venous sinus thrombosis; DVT, deep vein thrombosis; ER6, estrogen receptor 6; F, female; European Economic Area, EEA; European Union, EU; GERD, gastroesophageal reflux disease; HER2, human epidermal growth factor receptor 2; INR, international normalized ratio; IVIg, intravenous immunoglobulin; M, male; PF4, platelet factor 4; PR4, progesterone receptor 4; PT, prothrombin time; TTS, thrombosis with thrombocytopenia; yrs, years; Unk, unknown.

**Table S2. Estimated Background TTS Rates Using Two Analysis Methods with the US Truven MarketScan Commercial Claims and Encounters database from January 1, 2019 to December 31, 2019**

|                                                       | Event rate using method 1* | Event rate using method 2† |
|-------------------------------------------------------|----------------------------|----------------------------|
| Event rate per 1 million persons per 14-days (95% CI) | 3.75 (3.51–4.00)           | 7.16 (6.83–7.51)           |

Analysis was restricted to first TTS events enrollees aged 18 years or older on Jan 01, 2019. Rates (95% CI) were calculated by dividing the number of observed events with the person-time at risk (calculated from either the date of study period start to date of event; time of censoring due to end of continuous enrollment; or end of follow-up period). Standardization provided the rate per one million persons per 14 days. \*Defined as primary or unspecified thrombocytopenia occurring between seven days before and seven days after thrombosis event (focused on thrombosis of limbs, splanchnic region, and cerebral or pulmonary embolism) limited to patients without a history of thrombocytopenia and/or thrombotic event 12 months prior. †Defined as primary or unspecified thrombocytopenia occurring the day before, or 14 days after, thrombosis. CI, confidence interval; TTS, thrombosis with thrombocytopenia syndrome.

### ***Contributors***

All authors contributed to the development of the manuscript, including interpretation of results, substantive review of drafts, and approval of the final draft for submission. Madhavi Yadavalli and Nirmal Kumar Shankar accessed and verified the data. The authors wish to thank Sam Lindgren for his invaluable contribution to the AZD1222 project and to this article. Writing and editorial assistance provided by Fishawack Health was funded by AstraZeneca.
